# Supplementary material for: Fate-directed risk assessment of chemical mixtures: a case study for cedarwood essential oil
Source: Royal Society of Chemistry journal article supplement (doi:10.1039/d2em00103a), 2022-01-01
Supplement: d2em00103a1.pdf [file d2em00103a1.pdf]

## Supporting information - Fate-directed risk assessment of chemical mixtures: A case study for cedarwood essential oil

Roxana Sühning<sup>1,2</sup>, Philipp Mayer<sup>3</sup>, Pim Leonards<sup>4</sup>, Matthew MacLeod<sup>1</sup>

<sup>1</sup>Department for Environmental Science, Stockholm University, Stockholm, Sweden

<sup>2</sup>Department of Chemistry and Biology, Toronto Metropolitan University, Toronto, Canada

<sup>3</sup>Department of Environmental and Resource Engineering, Technical University of Denmark, 2800 Kgs. Lyngby, Denmark

<sup>4</sup> Department of Environment & Health, Vrije Universiteit Amsterdam, De Boelelaan 1105, 1081 HV Amsterdam, Netherlands

### Contents

|                                                                                                                                                                                                                                                                                                                                                                                                                                                   |   |
|---------------------------------------------------------------------------------------------------------------------------------------------------------------------------------------------------------------------------------------------------------------------------------------------------------------------------------------------------------------------------------------------------------------------------------------------------|---|
| <b>Table S1.</b> Input emissions [t/a] for the individual cedarwood oil constituents into air, water, and soil in the RAIDAR WWTP and reference scenario, respectively. ....                                                                                                                                                                                                                                                                      | 2 |
| <b>Table S2.</b> Minimum, median, and maximum environmental half-lives ( $T_{1/2}$ ) [h] water solubility (WS) [mg l <sup>-1</sup> ], vapor pressure (VP) [Pa], Henry's law constant (HCL) [Pa m <sup>3</sup> mol <sup>-1</sup> ], log octanol-water partitioning coefficient (Log $K_{ow}$ ), and toxicity for <i>Daphnia pulex</i> (EC <sub>50</sub> ) [μmol l <sup>-1</sup> ] of a hypothetical constituent for the Monte Carlo analysis. .... | 2 |
| <b>Table S3.</b> Distribution [%], biodegradation [%], and total emissions [%] of α-cedrene, β-cedrene, thujopsene, cuparene, and cedrol in wastewater treatment plants predicted by SimpleTreat .....                                                                                                                                                                                                                                            | 2 |
| <b>Table S4.</b> Distribution [%] of α-cedrene, β-cedrene, thujopsene, cuparene, and cedrol in air, water, soil, and sediment following emissions onto soil by application of sewage sludge estimated by RAIDAR .....                                                                                                                                                                                                                             | 3 |
| <b>Table S5.</b> Estimated RAFs for α-cedrene, β-cedrene, thujopsene, cuparene, and cedrol based on the control scenario .....                                                                                                                                                                                                                                                                                                                    | 4 |
| <b>Table S6.</b> Estimated RAFs for α-cedrene, β-cedrene, thujopsene, cuparene, and cedrol following emissions into air and water based on the fate-based scenario .....                                                                                                                                                                                                                                                                          | 5 |
| <b>Table S7.</b> Estimated RAFs for α-cedrene, β-cedrene, thujopsene, cuparene, and cedrol following emissions into soil based on the fate-based scenario .....                                                                                                                                                                                                                                                                                   | 6 |
| <b>Table S8.</b> Estimated 2.5 <sup>th</sup> percentile, 97.5 <sup>th</sup> percentile, median, and maximum RAFs for a hypothetical unidentified constituent with 1% contribution to the cedarwood oil mixture following emissions into air and water based on the fate-based scenario. ....                                                                                                                                                      | 7 |
| <b>Table S9.</b> Average cedarwood oil content [%] in the most common product categories containing cedarwood oil .....                                                                                                                                                                                                                                                                                                                           | 8 |
| <b>Figure S1.</b> Contribution to variance for the species with the highest predicted RAF in air/water and soil..                                                                                                                                                                                                                                                                                                                                 | 8 |
| <b>Table S10.</b> Estimated 2.5 <sup>th</sup> percentile, 97.5 <sup>th</sup> percentile, median, and maximum RAFs for a hypothetical unidentified constituent with 1% contribution to the cedarwood oil mixture following emissions into air and water based on the fate-based scenario with realistic physical chemical property combinations. ....                                                                                              | 9 |

**Table S1.** Input emissions [t/a] for the individual cedarwood oil constituents into air, water, and soil in the RAIDAR WWTP and reference scenario, respectively.

| Constituent       | <i>Emissions WWTP scenario [t/a]</i> |      |      | <i>Emissions reference- scenario [t/a]</i> |      |
|-------------------|--------------------------------------|------|------|--------------------------------------------|------|
|                   | Water                                | Air  | Soil | Water                                      | Air  |
| <b>α-Cedrene</b>  | 0.064                                | 3.8  | 1.9  | 2.9                                        | 2.9  |
| <b>β-Cedrene</b>  | 0.009                                | 0.58 | 0.29 | 0.44                                       | 0.44 |
| <b>Thujopsene</b> | 0.044                                | 2.7  | 1.4  | 2.1                                        | 2.1  |
| <b>Cuparene</b>   | 0.009                                | 0.41 | 0.24 | 0.33                                       | 0.33 |
| <b>Cedrol</b>     | 0.14                                 | 4.0  | 0.51 | 2.4                                        | 2.4  |

**Table S2.** Minimum, median, and maximum environmental half-lives ( $T_{1/2}$ ) [h] water solubility (WS) [mg l<sup>-1</sup>], vapor pressure (VP) [Pa], Henry's law constant (HCL) [Pa m<sup>3</sup> mol<sup>-1</sup>], log octanol-water partitioning coefficient (Log  $K_{ow}$ ), and toxicity for *Daphnia pulex* (EC<sub>50</sub>) [μmol l<sup>-1</sup>] of a hypothetical constituent for the Monte Carlo analysis.

|           |                                              | Minimum | Median | Maximum |
|-----------|----------------------------------------------|---------|--------|---------|
| $T_{1/2}$ | <b>Air</b>                                   | 0.052   | 2.6    | 5.2     |
|           | <b>Water</b>                                 | 50      | 122    | 200     |
|           | <b>Soil</b>                                  | 280     | 1372   | 28000   |
|           | <b>Sediment</b>                              | 820     | 40180  | 82000   |
|           | <b>Fish</b>                                  | 51      | 760    | 1499    |
|           | <b>Birds and Mammals</b>                     | 50      | 782    | 1500    |
|           | <b>WS</b>                                    | 0.066   | 0.15   | 24      |
|           | <b>VP</b>                                    | 0.07    | 3.6    | 7.0     |
|           | <b>HLC</b>                                   | 0.17    | 1705   | 26000   |
|           | <b>Log<math>K_{ow}</math></b>                | 3.0     | 5.9    | 10      |
|           | <b>EC<sub>50</sub> [μmol l<sup>-1</sup>]</b> | 0.21    | 13     | 25      |

**Table S3.** Distribution [%], biodegradation [%], and total emissions [%] of α-cedrene, β-cedrene, thujopsene, cuparene, and cedrol in wastewater treatment plants predicted by SimpleTreat

|                | <b>α-cedrene</b> | <b>β-cedrene</b> | <b>thujopsene</b> | <b>cuparene</b> | <b>cedrol</b> |
|----------------|------------------|------------------|-------------------|-----------------|---------------|
| Air            | 31               | 30               | 28                | 23              | 65            |
| Effluent       | 2.2              | 2.1              | 2.1               | 2.8             | 5.9           |
| Sludge         | 65               | 65               | 68.2              | 71.8            | 21            |
| Biodegradation | 2.3              | 2.0              | 2.0               | 2.6             | 8.0           |
| Total emission | 98               | 98               | 98                | 97              | 92            |

**Table S4.** Distribution [%] of  $\alpha$ -cedrene,  $\beta$ -cedrene, thujopsene, cuparene, and cedrol in air, water, soil, and sediment following emissions onto soil by application of sewage sludge estimated by RAIDAR

| <b>Constituent</b> | <b>Air</b>            | <b>Water</b>         | <b>Soil</b> | <b>Sediment</b>      |
|--------------------|-----------------------|----------------------|-------------|----------------------|
|                    | %                     | %                    | %           | %                    |
| $\alpha$ -cedrene  | $1.3 \times 10^{-2}$  | $2.4 \times 10^{-3}$ | 99.97       | $1.9 \times 10^{-2}$ |
| $\beta$ -cedrene   | $3.5 \times 10^{-2}$  | $1.9 \times 10^{-3}$ | 99.94       | $1.8 \times 10^{-2}$ |
| thujopsene         | $7.5 \times 10^{-3}$  | $1.7 \times 10^{-3}$ | 99.96       | $3.6 \times 10^{-2}$ |
| cuparene           | $6.1 \times 10^{-3}$  | $1.7 \times 10^{-3}$ | 99.96       | $2.9 \times 10^{-2}$ |
| cedrol             | $5.04 \times 10^{-4}$ | $1.6 \times 10^{-2}$ | 99.98       | $8.4 \times 10^{-3}$ |

**Table S5.** Estimated RAFs for  $\alpha$ -cedrene,  $\beta$ -cedrene, thujopsene, cuparene, and cedrol based on the control scenario

|                          | $\alpha$ -cedrene    | $\beta$ -cedrene     | thujopsene            | cuparene             | cedrol               | Minimum               | Median               | Maximum              |
|--------------------------|----------------------|----------------------|-----------------------|----------------------|----------------------|-----------------------|----------------------|----------------------|
| Foliage vegetation       | $2.1 \times 10^{-6}$ | $1.7 \times 10^{-6}$ | $6.8 \times 10^{-8}$  | $8.0 \times 10^{-5}$ | $1.4 \times 10^{-4}$ | $6.8 \times 10^{-8}$  | $2.1 \times 10^{-6}$ | $1.4 \times 10^{-4}$ |
| Root vegetation          | $9.8 \times 10^{-9}$ | $1.3 \times 10^{-8}$ | $3.6 \times 10^{-10}$ | $9.2 \times 10^{-9}$ | $2.3 \times 10^{-6}$ | $3.6 \times 10^{-10}$ | $9.8 \times 10^{-9}$ | $2.3 \times 10^{-6}$ |
| Plankton                 | 0.053                | 0.081                | 0.053                 | 0.042                | $9.5 \times 10^{-5}$ | $9.5 \times 10^{-5}$  | 0.051                | 0.081                |
| Benthic invertebrate     | 0.14                 | 0.22                 | 0.19                  | 0.11                 | $3.3 \times 10^{-4}$ | $3.3 \times 10^{-4}$  | 0.14                 | 0.22                 |
| Terrestrial invertebrate | $2.7 \times 10^{-7}$ | $4.4 \times 10^{-7}$ | $2.4 \times 10^{-8}$  | $7.6 \times 10^{-7}$ | $6.0 \times 10^{-6}$ | $2.4 \times 10^{-8}$  | $4.4 \times 10^{-7}$ | $6.0 \times 10^{-6}$ |
| Pelagic-benthic fish     | 0.073                | 0.10                 | 0.049                 | 0.015                | $4.7 \times 10^{-5}$ | $4.7 \times 10^{-5}$  | 0.049                | 0.10                 |
| Piscivorous fish         | 0.11                 | 0.14                 | $3.4 \times 10^{-2}$  | 0.046                | $3.6 \times 10^{-5}$ | $3.6 \times 10^{-5}$  | 0.034                | 0.14                 |
| Aquatic mammal           | 1.9                  | 1.8                  | 0.66                  | 0.24                 | $2.4 \times 10^{-4}$ | $2.4 \times 10^{-4}$  | 0.66                 | 1.85                 |
| Terrestrial herbivore    | $3.3 \times 10^{-5}$ | $2.4 \times 10^{-5}$ | $2.9 \times 10^{-6}$  | $3.2 \times 10^{-4}$ | $2.0 \times 10^{-4}$ | $2.9 \times 10^{-6}$  | $3.3 \times 10^{-5}$ | $3.2 \times 10^{-4}$ |
| Terrestrial carnivore    | $4.4 \times 10^{-4}$ | $2.2 \times 10^{-4}$ | $1.9 \times 10^{-5}$  | $1.6 \times 10^{-3}$ | $3.0 \times 10^{-4}$ | $1.9 \times 10^{-5}$  | $3.0 \times 10^{-4}$ | $1.6 \times 10^{-3}$ |
| Avian omnivore           | $1.1 \times 10^{-5}$ | $8.6 \times 10^{-6}$ | $7.8 \times 10^{-7}$  | $8.7 \times 10^{-5}$ | $4.8 \times 10^{-5}$ | $7.8 \times 10^{-7}$  | $1.1 \times 10^{-5}$ | $8.7 \times 10^{-5}$ |
| Avian scavenger          | 0.38                 | 0.26                 | $6.7 \times 10^{-2}$  | 0.029                | $5.5 \times 10^{-5}$ | $5.5 \times 10^{-5}$  | 0.067                | 0.38                 |
| Poultry (broiler)        | $2.0 \times 10^{-5}$ | $1.6 \times 10^{-5}$ | $1.3 \times 10^{-6}$  | $2.1 \times 10^{-4}$ | $1.3 \times 10^{-4}$ | $1. \times 10^{-6}$   | $2.0 \times 10^{-5}$ | $2.1 \times 10^{-4}$ |
| Poultry (layer)          | $1.4 \times 10^{-5}$ | $1.2 \times 10^{-5}$ | $1.1 \times 10^{-6}$  | $1.7 \times 10^{-4}$ | $1.2 \times 10^{-4}$ | $1.1 \times 10^{-6}$  | $1.4 \times 10^{-5}$ | $1.7 \times 10^{-4}$ |
| Pig                      | $5.1 \times 10^{-5}$ | $4.0 \times 10^{-5}$ | $4.3 \times 10^{-6}$  | $4.6 \times 10^{-4}$ | $2.8 \times 10^{-4}$ | $4.3 \times 10^{-6}$  | $5.1 \times 10^{-5}$ | $4.6 \times 10^{-4}$ |
| Cattle (beef)            | $5.9 \times 10^{-5}$ | $4.6 \times 10^{-5}$ | $5.4 \times 10^{-6}$  | $5.1 \times 10^{-4}$ | $3.1 \times 10^{-4}$ | $5.4 \times 10^{-6}$  | $5.9 \times 10^{-5}$ | $5.1 \times 10^{-4}$ |
| Cow (dairy)              | $4.1 \times 10^{-5}$ | $3.5 \times 10^{-5}$ | $4.2 \times 10^{-6}$  | $4.8 \times 10^{-4}$ | $3.4 \times 10^{-4}$ | $4.2 \times 10^{-6}$  | $4.1 \times 10^{-5}$ | $4.8 \times 10^{-4}$ |
| Dairy products           | $1.7 \times 10^{-5}$ | $1.5 \times 10^{-5}$ | $1.7 \times 10^{-6}$  | $2.0 \times 10^{-4}$ | $1.4 \times 10^{-4}$ | $1.7 \times 10^{-6}$  | $1.7 \times 10^{-5}$ | $2.0 \times 10^{-4}$ |
| Milk                     | $8.5 \times 10^{-6}$ | $7.3 \times 10^{-6}$ | $8.7 \times 10^{-7}$  | $9.9 \times 10^{-5}$ | $7.1 \times 10^{-5}$ | $8.7 \times 10^{-7}$  | $8.5 \times 10^{-6}$ | $9.9 \times 10^{-5}$ |
| Eggs                     | $1.4 \times 10^{-5}$ | $1.2 \times 10^{-5}$ | $1.1 \times 10^{-6}$  | $1.7 \times 10^{-4}$ | $1.2 \times 10^{-4}$ | $1.1 \times 10^{-6}$  | $1.4 \times 10^{-5}$ | $1.7 \times 10^{-4}$ |
| Dairy calf               | $2.1 \times 10^{-5}$ | $1.8 \times 10^{-5}$ | $2.2 \times 10^{-6}$  | $2.5 \times 10^{-4}$ | $1.8 \times 10^{-4}$ | $2.2 \times 10^{-6}$  | $2.1 \times 10^{-5}$ | $2.5 \times 10^{-4}$ |
| Human - adult male       | 0.018                | 0.014                | $2.1 \times 10^{-3}$  | $4.2 \times 10^{-4}$ | $5.0 \times 10^{-5}$ | $5.0 \times 10^{-5}$  | $2.1 \times 10^{-3}$ | 0.018                |

**Table S6.** Estimated RAFs for  $\alpha$ -cedrene,  $\beta$ -cedrene, thujopsene, cuparene, and cedrol following emissions into air and water based on the fate-based scenario

|                          | $\alpha$ -cedrene    | $\beta$ -cedrene     | thujopsene            | cuparene             | cedrol               | Minimum               | Median               | Maximum              |
|--------------------------|----------------------|----------------------|-----------------------|----------------------|----------------------|-----------------------|----------------------|----------------------|
| Foliage vegetation       | $3.1 \times 10^{-6}$ | $2.7 \times 10^{-6}$ | $1.1 \times 10^{-7}$  | $1.3 \times 10^{-4}$ | $2.7 \times 10^{-4}$ | $1.1 \times 10^{-7}$  | $2.9 \times 10^{-6}$ | $2.7 \times 10^{-4}$ |
| Root vegetation          | $1.5 \times 10^{-8}$ | $2.1 \times 10^{-8}$ | $5.9 \times 10^{-10}$ | $1.5 \times 10^{-8}$ | $4.4 \times 10^{-6}$ | $5.9 \times 10^{-10}$ | $1.5 \times 10^{-8}$ | $4.4 \times 10^{-6}$ |
| Plankton                 | $3.2 \times 10^{-3}$ | $4.8 \times 10^{-3}$ | $3.2 \times 10^{-3}$  | $2.5 \times 10^{-3}$ | $7.5 \times 10^{-6}$ | $7.5 \times 10^{-6}$  | $2.8 \times 10^{-3}$ | $4.8 \times 10^{-3}$ |
| Benthic invertebrate     | $8.6 \times 10^{-3}$ | 0.013                | 0.016                 | $6.9 \times 10^{-3}$ | $2.6 \times 10^{-5}$ | $2.6 \times 10^{-5}$  | $7.7 \times 10^{-3}$ | 0.013                |
| Terrestrial invertebrate | $4.1 \times 10^{-7}$ | $7.0 \times 10^{-7}$ | $3.9 \times 10^{-8}$  | $1.3 \times 10^{-6}$ | $1.2 \times 10^{-5}$ | $3.9 \times 10^{-8}$  | $5.5 \times 10^{-7}$ | $1.2 \times 10^{-5}$ |
| Pelagic-benthic fish     | $4.4 \times 10^{-3}$ | $6.2 \times 10^{-3}$ | $3.0 \times 10^{-3}$  | $9.0 \times 10^{-4}$ | $3.7 \times 10^{-6}$ | $3.7 \times 10^{-6}$  | $1.9 \times 10^{-3}$ | $6.2 \times 10^{-3}$ |
| Piscivorous fish         | $6.7 \times 10^{-3}$ | $8.3 \times 10^{-3}$ | $2.0 \times 10^{-3}$  | $2.8 \times 10^{-4}$ | $2.9 \times 10^{-6}$ | $2.9 \times 10^{-6}$  | $1.2 \times 10^{-3}$ | $8.3 \times 10^{-3}$ |
| Aquatic mammal           | 0.11                 | 0.11                 | 0.040                 | 0.015                | $1.9 \times 10^{-5}$ | $1.9 \times 10^{-5}$  | 0.027                | 0.11                 |
| Terrestrial herbivore    | $3.0 \times 10^{-5}$ | $2.2 \times 10^{-5}$ | $9.0 \times 10^{-7}$  | $5.2 \times 10^{-4}$ | $3.8 \times 10^{-4}$ | $9.0 \times 10^{-7}$  | $2.6 \times 10^{-5}$ | $5.2 \times 10^{-4}$ |
| Terrestrial carnivore    | $3.9 \times 10^{-4}$ | $2.0 \times 10^{-4}$ | $5.6 \times 10^{-6}$  | $2.6 \times 10^{-3}$ | $5.9 \times 10^{-4}$ | $5.6 \times 10^{-6}$  | $2.9 \times 10^{-4}$ | $2.6 \times 10^{-3}$ |
| Avian omnivore           | $1.2 \times 10^{-5}$ | $1.0 \times 10^{-5}$ | $4.0 \times 10^{-7}$  | $1.4 \times 10^{-4}$ | $9.2 \times 10^{-5}$ | $4.0 \times 10^{-7}$  | $1.1 \times 10^{-5}$ | $1.4 \times 10^{-4}$ |
| Avian scavenger          | 0.023                | 0.016                | $4.0 \times 10^{-3}$  | $2.1 \times 10^{-3}$ | $6.3 \times 10^{-5}$ | $6.3 \times 10^{-5}$  | $3.0 \times 10^{-3}$ | 0.023                |
| Poultry (broiler)        | $2.3 \times 10^{-5}$ | $1.9 \times 10^{-5}$ | $6.9 \times 10^{-7}$  | $3.4 \times 10^{-4}$ | $2.4 \times 10^{-4}$ | $6.9 \times 10^{-7}$  | $2.1 \times 10^{-5}$ | $3.4 \times 10^{-4}$ |
| Poultry (layer)          | $1.6 \times 10^{-5}$ | $1.4 \times 10^{-5}$ | $5.6 \times 10^{-7}$  | $2.7 \times 10^{-4}$ | $2.2 \times 10^{-4}$ | $5.6 \times 10^{-7}$  | $1.5 \times 10^{-5}$ | $2.7 \times 10^{-4}$ |
| Pig                      | $5.1 \times 10^{-5}$ | $4.0 \times 10^{-5}$ | $1.5 \times 10^{-6}$  | $7.6 \times 10^{-4}$ | $5.4 \times 10^{-4}$ | $1.5 \times 10^{-6}$  | $4.5 \times 10^{-5}$ | $7.6 \times 10^{-4}$ |
| Cattle (beef)            | $5.5 \times 10^{-5}$ | $4.3 \times 10^{-5}$ | $1.7 \times 10^{-6}$  | $8.4 \times 10^{-4}$ | $6.1 \times 10^{-4}$ | $1.7 \times 10^{-6}$  | $4.9 \times 10^{-5}$ | $8.4 \times 10^{-4}$ |
| Cow (dairy)              | $4.1 \times 10^{-5}$ | $3.5 \times 10^{-5}$ | $1.4 \times 10^{-6}$  | $8.0 \times 10^{-4}$ | $6.6 \times 10^{-4}$ | $1.4 \times 10^{-6}$  | $3.8 \times 10^{-5}$ | $8.0 \times 10^{-4}$ |
| Dairy products           | $1.7 \times 10^{-5}$ | $1.4 \times 10^{-5}$ | $5.8 \times 10^{-7}$  | $3.3 \times 10^{-4}$ | $2.8 \times 10^{-4}$ | $5.8 \times 10^{-7}$  | $1.6 \times 10^{-5}$ | $3.3 \times 10^{-4}$ |
| Milk                     | $8.4 \times 10^{-6}$ | $7.1 \times 10^{-6}$ | $2.9 \times 10^{-7}$  | $1.6 \times 10^{-4}$ | $1.4 \times 10^{-4}$ | $2.9 \times 10^{-7}$  | $7.8 \times 10^{-6}$ | $1.6 \times 10^{-4}$ |
| Eggs                     | $1.6 \times 10^{-5}$ | $1.4 \times 10^{-5}$ | $5.6 \times 10^{-7}$  | $2.7 \times 10^{-4}$ | $2.2 \times 10^{-4}$ | $5.6 \times 10^{-7}$  | $1.5 \times 10^{-5}$ | $2.7 \times 10^{-4}$ |
| Dairy calf               | $2.1 \times 10^{-5}$ | $1.8 \times 10^{-5}$ | $7.2 \times 10^{-7}$  | $4.1 \times 10^{-4}$ | $3.4 \times 10^{-4}$ | $7.2 \times 10^{-7}$  | $1.9 \times 10^{-5}$ | $4.1 \times 10^{-4}$ |
| Human - adult male       | $1.1 \times 10^{-3}$ | $8.7 \times 10^{-4}$ | $1.3 \times 10^{-4}$  | $3.0 \times 10^{-4}$ | $9.5 \times 10^{-5}$ | $9.5 \times 10^{-5}$  | $2.2 \times 10^{-4}$ | $1.1 \times 10^{-3}$ |

**Table S7.** Estimated RAFs for  $\alpha$ -cedrene,  $\beta$ -cedrene, thujopsene, cuparene, and cedrol following emissions into soil based on the fate-based scenario

|                          | $\alpha$ -cedrene    | $\beta$ -cedrene      | thujopsene           | cuparene             | cedrol               | Minimum              | Median               | Maximum              |
|--------------------------|----------------------|-----------------------|----------------------|----------------------|----------------------|----------------------|----------------------|----------------------|
| Foliage vegetation       | $2.6 \times 10^{-7}$ | $4.4 \times 10^{-7}$  | $2.4 \times 10^{-8}$ | $7.6 \times 10^{-7}$ | $3.8 \times 10^{-7}$ | $2.4 \times 10^{-8}$ | $3.8 \times 10^{-7}$ | $7.6 \times 10^{-7}$ |
| Root vegetation          | $2.2 \times 10^{-4}$ | $2.4 \times 10^{-4}$  | $4.5 \times 10^{-5}$ | $3.0 \times 10^{-5}$ | $2.0 \times 10^{-4}$ | $3.0 \times 10^{-5}$ | $2.0 \times 10^{-4}$ | $2.4 \times 10^{-4}$ |
| Plankton                 | $4.0 \times 10^{-5}$ | $5.2 \times 10^{-5}$  | $2.8 \times 10^{-5}$ | $2.6 \times 10^{-5}$ | $1.2 \times 10^{-6}$ | $1.2 \times 10^{-6}$ | $2.8 \times 10^{-5}$ | $5.2 \times 10^{-5}$ |
| Benthic invertebrate     | $1.1 \times 10^{-4}$ | $1.4 \times 10^{-4}$  | $1.0 \times 10^{-4}$ | $7.0 \times 10^{-5}$ | $4.2 \times 10^{-6}$ | $4.2 \times 10^{-6}$ | $1.0 \times 10^{-4}$ | $1.4 \times 10^{-4}$ |
| Terrestrial invertebrate | $6.0 \times 10^{-3}$ | $8.3 \times 10^{-3}$  | $3.0 \times 10^{-3}$ | $2.5 \times 10^{-3}$ | $5.3 \times 10^{-4}$ | $5.3 \times 10^{-4}$ | $3.0 \times 10^{-3}$ | $8.3 \times 10^{-3}$ |
| Pelagic-benthic fish     | $5.6 \times 10^{-5}$ | $6.7 \times 10^{-5}$  | $2.6 \times 10^{-5}$ | $9.1 \times 10^{-6}$ | $6.2 \times 10^{-7}$ | $6.2 \times 10^{-7}$ | $2.6 \times 10^{-5}$ | $6.7 \times 10^{-5}$ |
| Piscivorous fish         | $8.5 \times 10^{-5}$ | $9.0 \times 10^{-5}$  | $1.8 \times 10^{-5}$ | $2.8 \times 10^{-6}$ | $4.7 \times 10^{-7}$ | $4.7 \times 10^{-7}$ | $1.8 \times 10^{-5}$ | $9.0 \times 10^{-5}$ |
| Aquatic mammal           | $1.4 \times 10^{-3}$ | $1.2 \times 10^{-3}$  | $3.5 \times 10^{-4}$ | $1.5 \times 10^{-4}$ | $3.1 \times 10^{-6}$ | $3.1 \times 10^{-6}$ | $3.5 \times 10^{-4}$ | $1.4 \times 10^{-3}$ |
| Terrestrial herbivore    | $1.5 \times 10^{-4}$ | $1.1 \times 10^{-4}$  | $1.4 \times 10^{-5}$ | $1.6 \times 10^{-5}$ | $3.2 \times 10^{-5}$ | $1.4 \times 10^{-5}$ | $3.2 \times 10^{-5}$ | $1.5 \times 10^{-4}$ |
| Terrestrial carnivore    | $1.9 \times 10^{-3}$ | $8.8 \times 10^{-4}$  | $7.1 \times 10^{-5}$ | $7.7 \times 10^{-5}$ | $4.9 \times 10^{-5}$ | $4.9 \times 10^{-5}$ | $7.7 \times 10^{-5}$ | $1.9 \times 10^{-3}$ |
| Avian omnivore           | $9.7 \times 10^{-3}$ | $7.4 \times 10^{-3}$  | $1.8 \times 10^{-3}$ | $3.3 \times 10^{-3}$ | $2.4 \times 10^{-4}$ | $2.4 \times 10^{-4}$ | $3.3 \times 10^{-3}$ | $9.7 \times 10^{-3}$ |
| Avian scavenger          | $8.1 \times 10^{-3}$ | $5.6 \times 10^{-3}$  | $1.3 \times 10^{-3}$ | $1.7 \times 10^{-3}$ | $1.0 \times 10^{-4}$ | $1.0 \times 10^{-4}$ | $1.7 \times 10^{-3}$ | $8.1 \times 10^{-3}$ |
| Poultry (broiler)        | $6.1 \times 10^{-5}$ | $4.8 \times 10^{-5}$  | $5.9 \times 10^{-6}$ | $5.9 \times 10^{-6}$ | $9.7 \times 10^{-6}$ | $5.9 \times 10^{-6}$ | $9.7 \times 10^{-6}$ | $6.1 \times 10^{-5}$ |
| Poultry (layer)          | $4.1 \times 10^{-5}$ | $3.6 \times 10^{-5}$  | $4.8 \times 10^{-6}$ | $4.7 \times 10^{-6}$ | $9.0 \times 10^{-6}$ | $4.7 \times 10^{-6}$ | $9.0 \times 10^{-6}$ | $4.1 \times 10^{-5}$ |
| Pig                      | $4.6 \times 10^{-4}$ | $3.7 \times 10^{-4}$  | $4.6 \times 10^{-5}$ | $3.4 \times 10^{-5}$ | $7.1 \times 10^{-5}$ | $3.4 \times 10^{-5}$ | $7.1 \times 10^{-5}$ | $4.6 \times 10^{-4}$ |
| Cattle (beef)            | $1.5 \times 10^{-4}$ | $1.2 \times 10^{-4}$  | $1.5 \times 10^{-5}$ | $1.5 \times 10^{-5}$ | $2.4 \times 10^{-5}$ | $1.5 \times 10^{-5}$ | $2.4 \times 10^{-5}$ | $1.5 \times 10^{-4}$ |
| Cow (dairy)              | $1.2 \times 10^{-4}$ | $1.01 \times 10^{-4}$ | $1.4 \times 10^{-5}$ | $1.4 \times 10^{-5}$ | $2.7 \times 10^{-5}$ | $1.4 \times 10^{-5}$ | $2.7 \times 10^{-5}$ | $1.2 \times 10^{-4}$ |
| Dairy products           | $4.9 \times 10^{-5}$ | $4.4 \times 10^{-5}$  | $5.8 \times 10^{-6}$ | $5.7 \times 10^{-6}$ | $1.1 \times 10^{-5}$ | $5.7 \times 10^{-6}$ | $1.1 \times 10^{-5}$ | $4.9 \times 10^{-5}$ |
| Milk                     | $2.5 \times 10^{-5}$ | $2.2 \times 10^{-5}$  | $2.9 \times 10^{-6}$ | $2.8 \times 10^{-6}$ | $5.5 \times 10^{-6}$ | $2.8 \times 10^{-6}$ | $5.5 \times 10^{-6}$ | $2.5 \times 10^{-5}$ |
| Eggs                     | $4.1 \times 10^{-5}$ | $3.6 \times 10^{-5}$  | $4.8 \times 10^{-6}$ | $4.7 \times 10^{-6}$ | $9.0 \times 10^{-6}$ | $4.7 \times 10^{-6}$ | $9.0 \times 10^{-6}$ | $4.1 \times 10^{-5}$ |
| Dairy calf               | $6.1 \times 10^{-5}$ | $5.5 \times 10^{-5}$  | $7.3 \times 10^{-6}$ | $7.2 \times 10^{-6}$ | $1.4 \times 10^{-5}$ | $7.2 \times 10^{-6}$ | $1.4 \times 10^{-5}$ | $6.1 \times 10^{-5}$ |
| Human - adult male       | $3.1 \times 10^{-4}$ | $1.9 \times 10^{-4}$  | $1.8 \times 10^{-5}$ | $1.1 \times 10^{-5}$ | $1.5 \times 10^{-5}$ | $1.1 \times 10^{-5}$ | $1.8 \times 10^{-5}$ | $3.1 \times 10^{-4}$ |

**Table S8.** Estimated 2.5<sup>th</sup> percentile, 97.5<sup>th</sup> percentile, median, and maximum RAFs for a hypothetical unidentified constituent with 1% contribution to the cedarwood oil mixture following emissions into air and water based on the fate-based scenario.

|                          | <b>2.5th<br/>percentile</b> | <b>97.5th<br/>percentile</b> | <b>Median</b>        | <b>Maximum</b>       |
|--------------------------|-----------------------------|------------------------------|----------------------|----------------------|
| Foliage vegetation       | $1.1 \times 10^{-9}$        | $1.9 \times 10^{-5}$         | $1.4 \times 10^{-7}$ | $2.3 \times 10^{-3}$ |
| Root vegetation          | $3.9 \times 10^{-11}$       | $2.8 \times 10^{-8}$         | $1.5 \times 10^{-9}$ | $7.4 \times 10^{-6}$ |
| Plankton                 | $1.2 \times 10^{-6}$        | $9.9 \times 10^{-4}$         | $5.9 \times 10^{-5}$ | 0.018                |
| Benthic invertebrate     | $4.5 \times 10^{-6}$        | $5.6 \times 10^{-3}$         | $2.4 \times 10^{-4}$ | 0.12                 |
| Terrestrial invertebrate | $1.3 \times 10^{-9}$        | $5.9 \times 10^{-7}$         | $3.4 \times 10^{-8}$ | $1.0 \times 10^{-4}$ |
| Pelagic-benthic fish     | $2.0 \times 10^{-6}$        | $1.2 \times 10^{-3}$         | $5.6 \times 10^{-5}$ | 0.041                |
| Piscivorous fish         | $2.9 \times 10^{-6}$        | $1.2 \times 10^{-3}$         | $4.9 \times 10^{-5}$ | 0.047                |
| Aquatic mammal           | $4.4 \times 10^{-6}$        | 0.097                        | $1.1 \times 10^{-3}$ | 0.80                 |
| Terrestrial herbivore    | $9.8 \times 10^{-9}$        | $1.4 \times 10^{-4}$         | $8.9 \times 10^{-7}$ | $7.7 \times 10^{-3}$ |
| Terrestrial carnivore    | $2.6 \times 10^{-8}$        | $1.9 \times 10^{-3}$         | $6.2 \times 10^{-6}$ | 0.093                |
| Avian omnivore           | $4.4 \times 10^{-9}$        | $4.6 \times 10^{-5}$         | $3.9 \times 10^{-7}$ | $2.2 \times 10^{-3}$ |
| Avian scavenger          | $4.6 \times 10^{-7}$        | 0.012                        | $1.8 \times 10^{-4}$ | 0.29                 |
| Poultry (broiler)        | $8.0 \times 10^{-9}$        | $8.9 \times 10^{-5}$         | $6.6 \times 10^{-7}$ | $4.9 \times 10^{-3}$ |
| Poultry (layer)          | $7.7 \times 10^{-9}$        | $5.8 \times 10^{-5}$         | $4.7 \times 10^{-7}$ | $4.0 \times 10^{-3}$ |
| Pig                      | $1.8 \times 10^{-8}$        | $2.0 \times 10^{-4}$         | $1.4 \times 10^{-6}$ | 0.011                |
| Cattle (beef)            | $1.9 \times 10^{-8}$        | $2.2 \times 10^{-4}$         | $1.5 \times 10^{-6}$ | 0.012                |
| Cow (dairy)              | $1.8 \times 10^{-8}$        | $1.7 \times 10^{-4}$         | $1.3 \times 10^{-6}$ | 0.012                |
| Dairy products           | $7.3 \times 10^{-9}$        | $6.5 \times 10^{-5}$         | $5.1 \times 10^{-7}$ | $4.5 \times 10^{-3}$ |
| Milk                     | $3.7 \times 10^{-9}$        | $3.3 \times 10^{-5}$         | $2.6 \times 10^{-7}$ | $2.2 \times 10^{-3}$ |
| Eggs                     | $7.7 \times 10^{-9}$        | $5.8 \times 10^{-5}$         | $4.7 \times 10^{-7}$ | $4.0 \times 10^{-3}$ |
| Dairy calf               | $9.1 \times 10^{-9}$        | $8.9 \times 10^{-5}$         | $6.6 \times 10^{-7}$ | $6.1 \times 10^{-3}$ |
| Human - adult male       | $7.4 \times 10^{-8}$        | $4.0 \times 10^{-4}$         | $6.9 \times 10^{-6}$ | $9.9 \times 10^{-3}$ |

**Table S9.** Average cedarwood oil content [%] in the most common product categories containing cedarwood oil

| Product category                     | Type                         | average content |
|--------------------------------------|------------------------------|-----------------|
| Cleaning products and household care | air freshener                | 4.5             |
| Cleaning products and household care | laundry and fabric treatment | 5.0             |
| Personal care                        | body/face wash               | 0.41            |
| Personal care                        | hair styling and care        | 4.4             |
| Personal care                        | children’s products          | n/a             |
| Personal care                        | deodorant                    | 0.50            |
| Personal care                        | insect repellent             | 0.68            |
| Pesticide                            | insecticide                  | 1.0             |
| Pet care                             | pet shampoo                  | 1.0             |

**Figure S1.** Contribution to variance for the species with the highest predicted RAF in air/water and soil

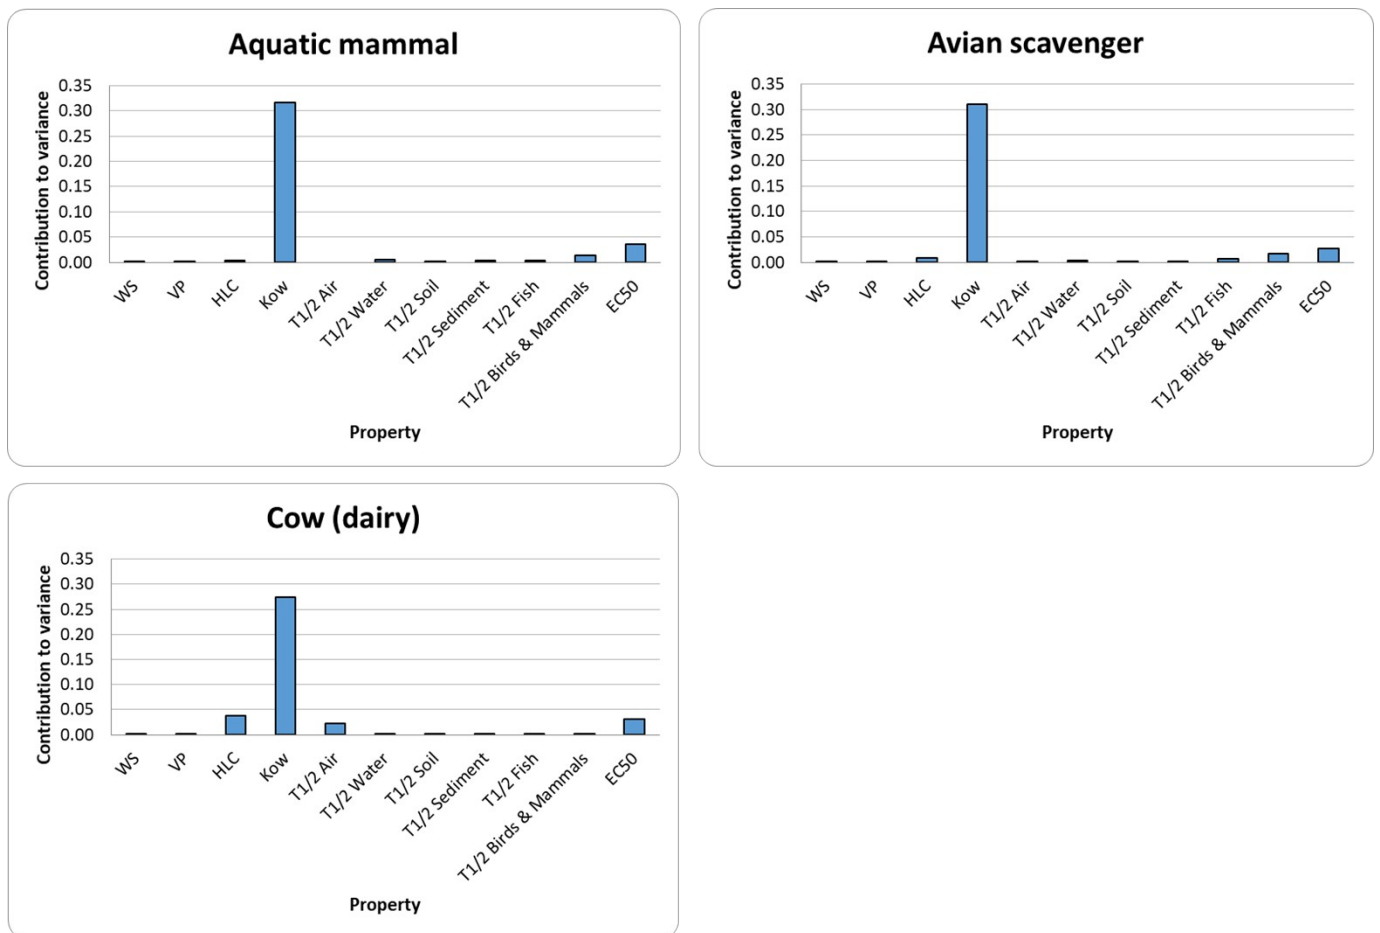



**Table S10.** Estimated 2.5<sup>th</sup> percentile, 97.5<sup>th</sup> percentile, median, and maximum RAFs for a hypothetical unidentified constituent with 1% contribution to the cedarwood oil mixture following emissions into air and water based on the fate-based scenario with realistic physical chemical property combinations.

|                          | <b>2.5th percentile</b> | <b>97.5th percentile</b> | <b>Median</b>          | <b>Maximum</b>         |
|--------------------------|-------------------------|--------------------------|------------------------|------------------------|
| Foliage vegetation       | 4.3 x 10 <sup>-10</sup> | 1.1 x 10 <sup>-5</sup>   | 3.4 x 10 <sup>-8</sup> | 1.0 x 10 <sup>-3</sup> |
| Root vegetation          | 3.1 x 10 <sup>-11</sup> | 6.8 x 10 <sup>-8</sup>   | 2.0 x 10 <sup>-9</sup> | 7.4 x 10 <sup>-6</sup> |
| Plankton                 | 8.3 x 10 <sup>-7</sup>  | 4.7 x 10 <sup>-4</sup>   | 1.7 x 10 <sup>-5</sup> | 9.4 x 10 <sup>-3</sup> |
| Benthic invertebrate     | 3.0 x 10 <sup>-6</sup>  | 2.3 x 10 <sup>-3</sup>   | 8.6 x 10 <sup>-5</sup> | 0.064                  |
| Terrestrial invertebrate | 5.5 x 10 <sup>-10</sup> | 5.0 x 10 <sup>-7</sup>   | 2.3 x 10 <sup>-8</sup> | 1.0 x 10 <sup>-4</sup> |
| Pelagic-benthic fish     | 1.5 x 10 <sup>-6</sup>  | 5.7 x 10 <sup>-4</sup>   | 2.7 x 10 <sup>-5</sup> | 0.014                  |
| Piscivorous fish         | 1.7 x 10 <sup>-6</sup>  | 6.4 x 10 <sup>-4</sup>   | 2.8 x 10 <sup>-5</sup> | 0.014                  |
| Aquatic mammal           | 3.7 x 10 <sup>-6</sup>  | 9.7 x 10 <sup>-3</sup>   | 3.8 x 10 <sup>-4</sup> | 0.59                   |
| Terrestrial herbivore    | 4.2 x 10 <sup>-9</sup>  | 5.8 x 10 <sup>-5</sup>   | 2.5 x 10 <sup>-7</sup> | 3.9 x 10 <sup>-3</sup> |
| Terrestrial carnivore    | 1.1 x 10 <sup>-8</sup>  | 8.0 x 10 <sup>-4</sup>   | 1.4 x 10 <sup>-6</sup> | 0.082                  |
| Avian omnivore           | 1.8 x 10 <sup>-9</sup>  | 1.9 x 10 <sup>-5</sup>   | 1.2 x 10 <sup>-7</sup> | 1.2 x 10 <sup>-3</sup> |
| Avian scavenger          | 2.7 x 10 <sup>-7</sup>  | 2.9 x 10 <sup>-3</sup>   | 4.5 x 10 <sup>-5</sup> | 0.21                   |
| Poultry (broiler)        | 3.4 x 10 <sup>-9</sup>  | 3.7 x 10 <sup>-5</sup>   | 2.0 x 10 <sup>-7</sup> | 2.6 x 10 <sup>-3</sup> |
| Poultry (layer)          | 3.3 x 10 <sup>-9</sup>  | 2.5 x 10 <sup>-5</sup>   | 1.6 x 10 <sup>-7</sup> | 1.5 x 10 <sup>-3</sup> |
| Pig                      | 7.8 x 10 <sup>-9</sup>  | 8.4 x 10 <sup>-5</sup>   | 4.3 x 10 <sup>-7</sup> | 5.9 x 10 <sup>-3</sup> |
| Cattle (beef)            | 8.3 x 10 <sup>-9</sup>  | 9.4 x 10 <sup>-5</sup>   | 4.5 x 10 <sup>-7</sup> | 6.6 x 10 <sup>-3</sup> |
| Cow (dairy)              | 7.9 x 10 <sup>-9</sup>  | 7.3 x 10 <sup>-5</sup>   | 3.9 x 10 <sup>-7</sup> | 4.4 x 10 <sup>-3</sup> |
| Dairy products           | 3.3 x 10 <sup>-9</sup>  | 2.8 x 10 <sup>-5</sup>   | 1.6 x 10 <sup>-7</sup> | 1.8 x 10 <sup>-3</sup> |
| Milk                     | 1.6 x 10 <sup>-9</sup>  | 1.4 x 10 <sup>-5</sup>   | 8.0 x 10 <sup>-7</sup> | 9.0 x 10 <sup>-4</sup> |
| Eggs                     | 3.3 x 10 <sup>-9</sup>  | 2.5 x 10 <sup>-5</sup>   | 1.6 x 10 <sup>-8</sup> | 1.5 x 10 <sup>-3</sup> |
| Dairy calf               | 4.1 x 10 <sup>-9</sup>  | 3.8 x 10 <sup>-5</sup>   | 2.0 x 10 <sup>-7</sup> | 2.3 x 10 <sup>-3</sup> |
| Human - adult male       | 4.7 x 10 <sup>-8</sup>  | 1.3 x 10 <sup>-4</sup>   | 2.5 x 10 <sup>-6</sup> | 9.9 x 10 <sup>-3</sup> |
